# Supplementary material
Source: PubMed Central journal article supplement (PMC3160031)
Supplement: supp_tpc.111.086546_Supplemental_Data._Zhao.pdf [file supp_tpc.111.086546_Supplemental_Data._Zhao.pdf]

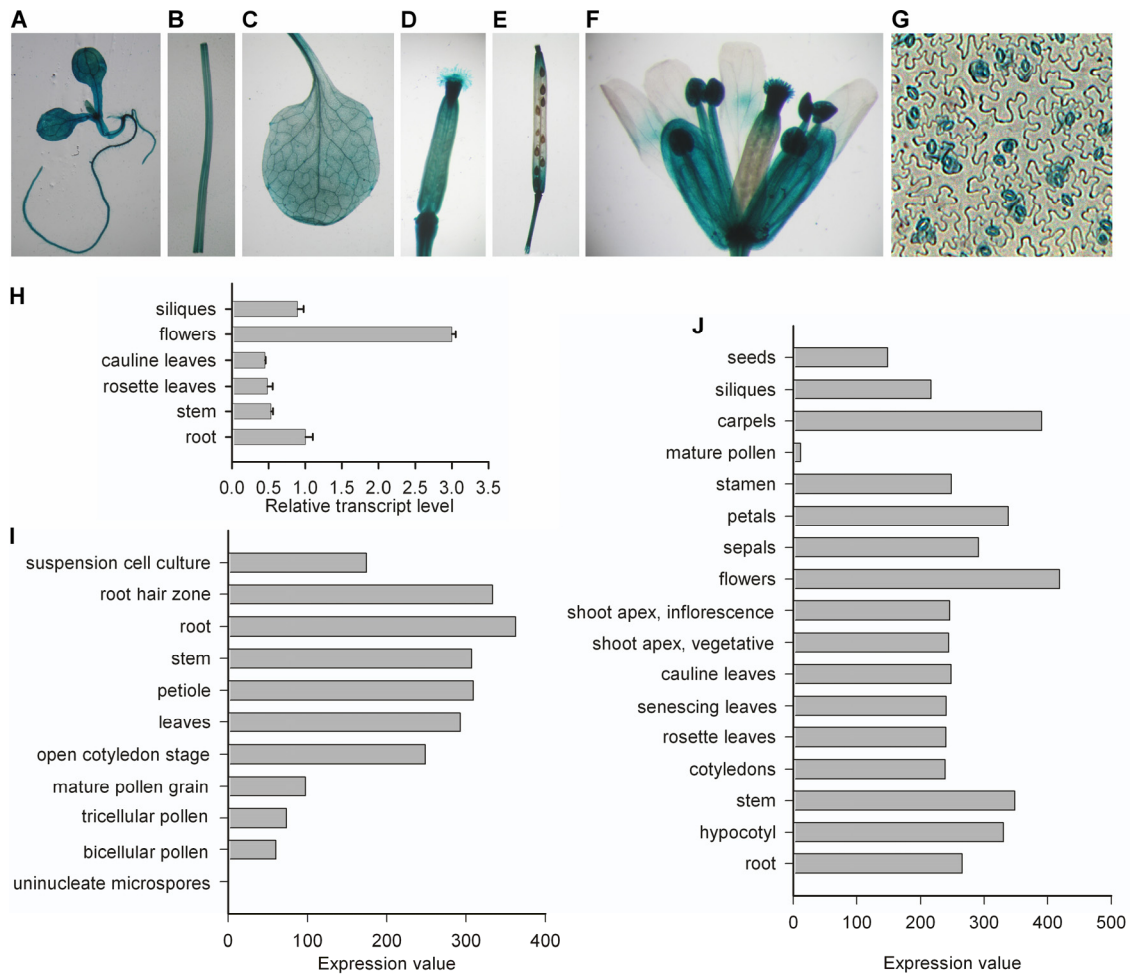

**Supplemental Figure 1. Expression of *SCAB1* and its homologs in *Arabidopsis*.**

**(A-G)** The *SCAB1* expression pattern as indicated by the promoter and GUS reporter fusion. *ProSCAB1:GUS* expression in seedlings **(A)**, stems **(B)**, leaves **(C)**, pistils **(D)**, siliques **(E)**, flowers **(F)**, and an epidermal peel **(G)**.

**(H)** Expression of *SCAB1* in various *Arabidopsis* tissues. Total RNA was extracted from the roots, stems, leaves, flowers, and siliques of 1-month-old WT plants. Real-time PCR was performed using *SCAB1*-specific primers. *Elongation factor 1 $\alpha$*  (*EF*) was used as an internal control. The data given are the means  $\pm$  SD ( $n = 3$ ).

**(I)** Microarray analysis of *SCAB1* expression in pollen and other organs using data from the NASC (Honys and Twell, 2004).

**(J)** Microarray analysis of *SCAB1* expression in different organs using data from AtGeneExpress (Schmid et al., 2005).

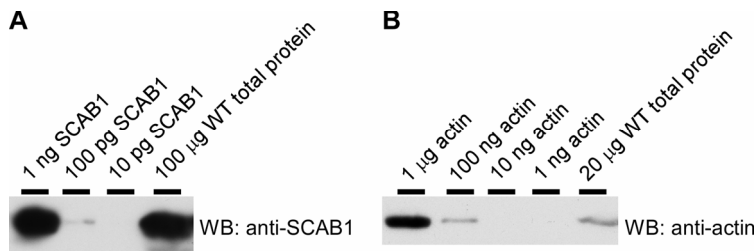

**Supplemental Figure 2. Analyses of native SCAB1 concentration.**

**(A)** Immunoblot analysis of the putative SCAB1 level in seedlings using anti-SCAB1 antibodies. Lanes 1-3 from left: 1 ng, 100 pg, and 10 pg of purified recombinant SCAB1; Lane 4, 100 µg of total soluble protein extracted from 1-day-old WT seedlings.

**(B)** Immunoblot analysis of the actin level in seedlings using anti-actin polyclonal antibodies. Lanes 1-4 from left: 1 µg, 100 ng, 10 ng, and 1 ng of purified actin; Lane 4, 20 µg of total soluble protein extracted from 1-day-old WT seedlings.

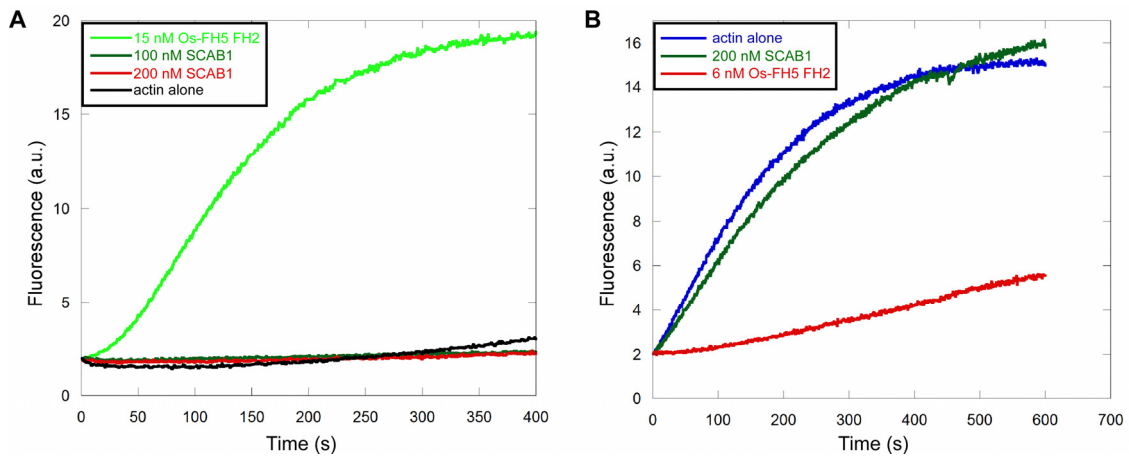

**Supplemental Figure 3. SCAB1 lacks nucleation or capping activity.**

**(A)** Time course of actin polymerization in the presence of SCAB1 or Os-FH5 FH2 monitored by pyrene fluorescence. Actin nucleation assays were performed as described (Higgs et al., 1999). Proteins were incubated with G-actin (2  $\mu$ M 5% pyrene-labeled) for 5 min at room temperature. After the addition of 1/10 volume of 10 $\times$  KMEI buffer (100 mM imidazole, 500 mM KCl, 10 mM MgCl<sub>2</sub>, and 10 mM EGTA, pH 7.0), pyrene fluorescence was monitored immediately using a QuantaMaster Luminescence QM 3 PH fluorometer (Photo Technology International). Os-FH5 FH2, which can nucleate actin assembly (Yang et al., 2011; Zhang et al., 2011), was used as a positive control. a.u., arbitrary units.

**(B)** Kinetics of actin filament barbed-end elongation in the presence of SCAB1 or Os-FH5 FH2. Actin elongation assays were performed as described (Michelot et al., 2005). Preformed actin filament seeds (0.8  $\mu$ M) were incubated with 200 nM SCAB1 or 6 nM Os-FH5 FH2 at room temperature for 5 min. Pyrene fluorescence was monitored after the addition of 1.0  $\mu$ M G-actin (10% pyrene-labeled) saturated with 4  $\mu$ M human profilin I. a.u., arbitrary units. Os-FH5 FH2, which can cap the barbed end of actin filaments (Yang et al., 2011; Zhang et al., 2011), was used as a positive control. a.u., arbitrary units.

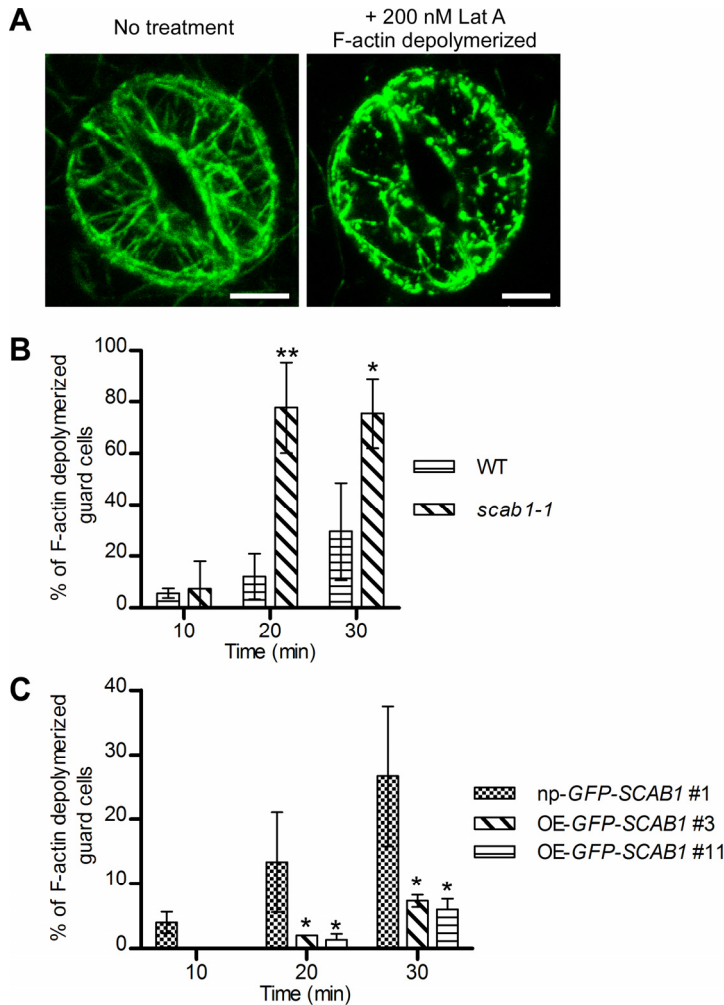

**Supplemental Figure 4. SCAB1 delayed the Lat A-induced depolymerization of actin filaments in guard cells.**

**(A)** Typical organization of actin filaments in guard cells from *35S::GFP-fABD2-GFP* transgenic plants without (left column) or with (right column) Lat A treatment. Scale bars, 5  $\mu$ m.

**(B)** Percentage of guard cells from WT and *scab1-1* mutant plants with depolymerized actin filaments after Lat A treatment. The actin pattern shown in the right column in (A) was defined as depolymerized. Significant differences were observed between WT and *scab1-1* after 20 and 30 min of treatment (\* $p < 0.05$ , \*\* $p < 0.01$ , one-way ANOVA; post hoc: Tukey HSD). At least 50 guard cells were analyzed in each experiment (means  $\pm$  SD,  $n = 3$ ).

**(C)** Percentage of guard cells from np-*GFP-SCAB1* #1 and OE-*GFP-SCAB1* #1 and OE-*GFP-SCAB1* #11 plants with depolymerized actin filaments after Lat A treatment. Significant differences were observed between np-*GFP-SCAB1* #1 and OE-*GFP-SCAB1*

plants after 20 and 30 min of treatment (\* $p < 0.05$ , one-way ANOVA; post hoc: Tukey HSD). At least 50 guard cells were analyzed in each experiment (means  $\pm$  SD,  $n = 3$ ). F-actin depolymerization in guard cells was assessed using cotyledons from 6-day-old transgenic seedlings harboring *35S:GFP-fABD2-GFP*. The seedlings were treated with 200 nM Lat A for 10, 20, or 30 min. The status of the actin filaments was determined using a Zeiss LSM510 Meta confocal microscope with a Plan-Apochromat 63 $\times$ /1.4 oil objective. Those cells exhibiting dot-like GFP fluorescence were considered to be F-actin-depolymerized.

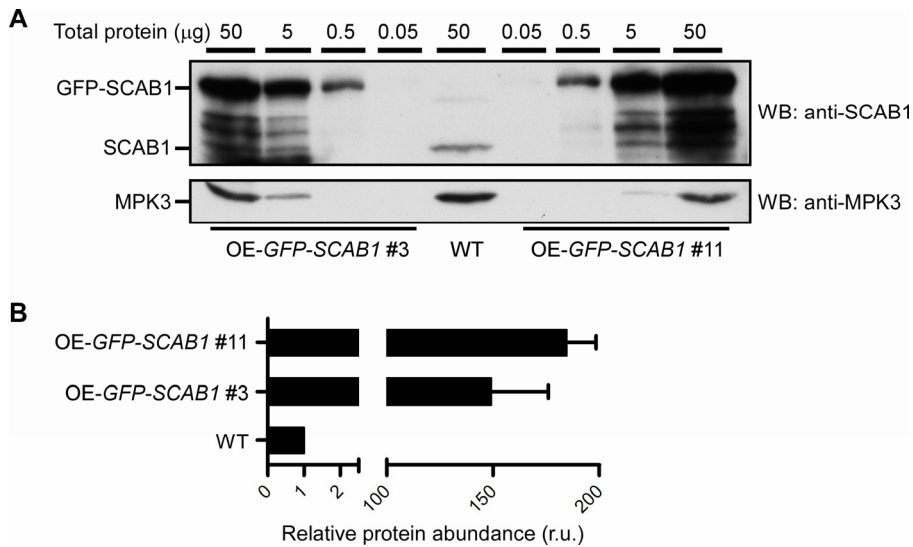

**Supplemental Figure 5. Level of SCAB1 protein in SCAB1 overexpressing plants.**

**(A)** Immunoblot analysis of 50  $\mu\text{g}$  of total soluble protein extracted from 1-day-old WT and *GFP-SCAB1* overexpression plants with anti-SCAB1 or -MPK3 (loading control) antibodies.

**(B)** The experiments described in **(A)** were repeated 3 times. The amount of SCAB1 was determined by densitometry. The SCAB1 protein level in WT was arbitrarily set to 1. r.u., relative unit. The data given are the means  $\pm$  SD.

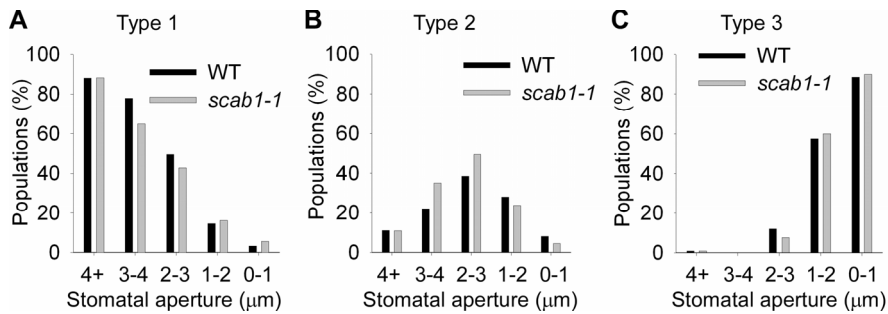

**Supplemental Figure 6. Histograms showing the stomatal apertures with actin organization in guard cells from WT and *scab1-1* plants.**

Confocal images of guard cells in rosette leaves from *Pro35S:GFP-fABD2-GFP* transgenic plants in a WT and *scab1-1* background were obtained following 20 μM ABA treatment. Actin organization was classified into 3 groups. Representative images of type 1 'radial array', type 2 'random meshwork', and type 3 'longitudinal array' are shown in Figure 8A-C, respectively. At the indicated stage of stomatal opening, the guard cells were classified into 3 groups: type 1 (A), type 2 (B), and type 3 (C). Population distributions were examined in 985 (WT) and 964 (*scab1-1*) independent guard cells.

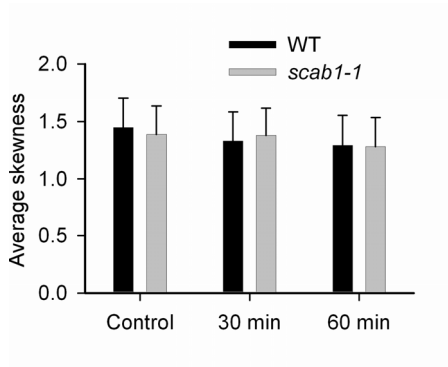

**Supplemental Figure 7. SCAB1 does not alter skewness in guard cells.**

Confocal images of guard cells in rosette leaves from *Pro35S:GFP-fABD2-GFP* transgenic plants in a WT or *scab1-1* background were obtained at the indicated times after 20  $\mu$ M ABA treatment. The micrographs were analyzed using ImageJ with the plugins Hig Skewness and KbiPlugins (available at <http://hasezawa.ib.k.u-tokyo.ac.jp/zp/Kbi/HigStomata>). The data given are the means  $\pm$  SD of 100-120 independent pairs of guard cells.



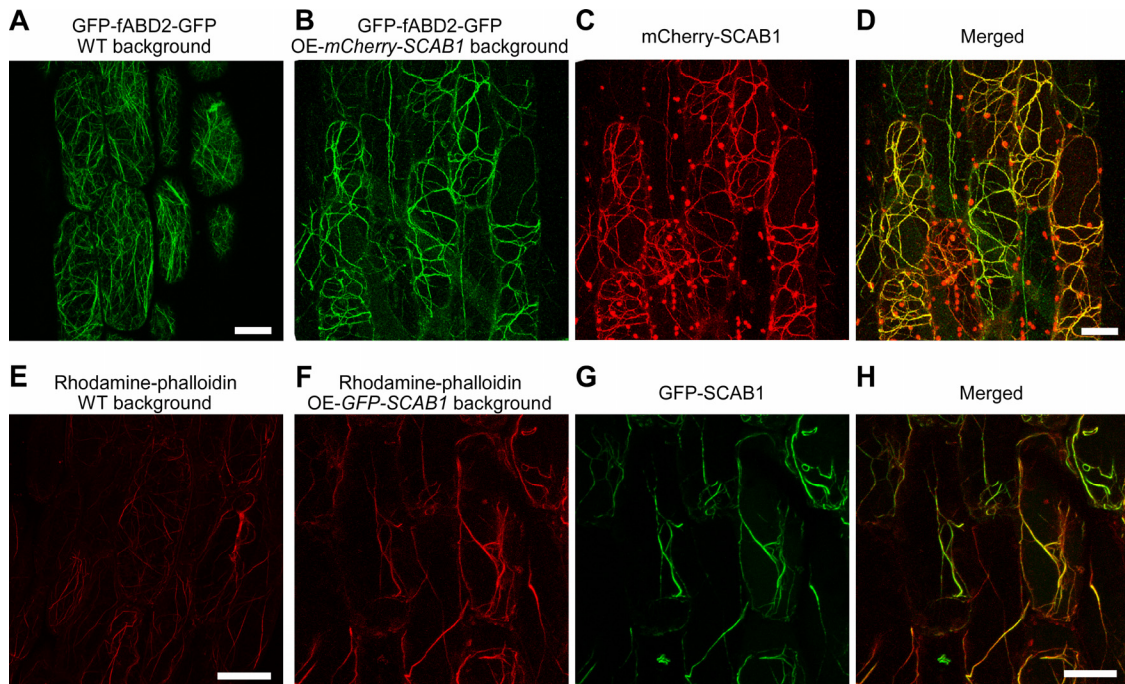

**Supplemental Figure 8. SCAB1 bundles MFs in vivo.**

**(A-B)** Typical GFP-fABD2-GFP images in hypocotyl epidermal cells taken from transgenic plants in a WT background **(A)** and in an *mCherry-SCAB1* overexpression background **(B)**. Note that fABD2 in **(B)** has fewer actin filaments or bundles and more thick actin bundles compared with that in **(A)**. About 83% of the cells in the WT background showed a pattern similar to that in **(A)**, whereas 93% of the cells in the OE-*mCherry-SCAB1* background showed a pattern similar to that in **(B)**. The dots in **(C)** are from chlorophyll autofluorescence. About 100 cells in 4 independent experiments with at least 3 individual transgenic lines per background were counted.

**(C)** The corresponding mCherry channel of **(B)**.

**(D)** Merged image of **(B)** and **(C)**.

**(E-H)** Rhodamine-phalloidin-stained actin filaments stained in hypocotyl epidermal cells of transgenic plants in a WT background **(E)** and in a *GFP-SCAB1* overexpression background **(F)**. The MFs in **(F)** have thicker actin bundles compared with those in **(E)**. Some local differences in the merged image are due to differences in GFP-SCAB1 expression level and rhodamine-phalloidin staining level.

**(G)** The corresponding GFP channel of **(F)**.

**(H)** Merged image of **(F)** and **(G)**.

Scale bars, 20  $\mu$ m.

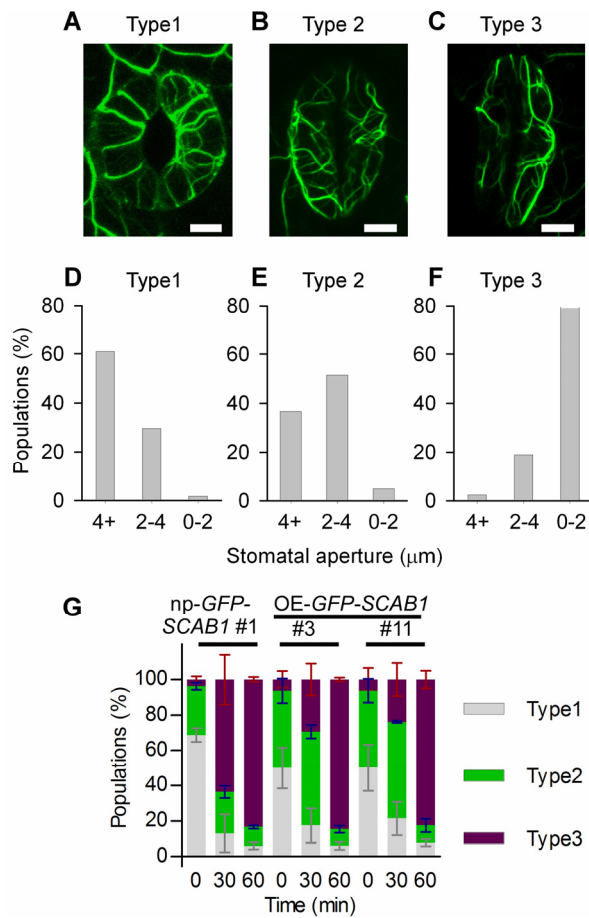

**Supplemental Figure 9. Overexpression of SCAB1 delays**

**GFP-SCAB1-labeled actin reorganization during stomatal closure.**

(A-C) Confocal images of guard cells in rosette leaves from *GFP-SCAB1* transgenic plants were obtained following 20  $\mu\text{M}$  ABA treatment. SCAB1 localization was classified into 3 groups. Representative images of type 1 ‘radial array’ (A), type 2 ‘random meshwork’ (B), and type 3 ‘longitudinal array’ (C) are shown. Bars, 5  $\mu\text{m}$ .

(D-F) At the indicated stage of stomatal opening, guard cells were classified into 3 groups according to the SCAB1 patterns in (A-C). Stomatal aperture was measured using LSM Image Browser software. The population distributions were examined in 617 independent guard cells.

(G) Histograms showing the GFP-SCAB1-labeled MF organization in guard cells from np-*GFP-SCAB1* #1 and OE-*GFP-SCAB1* plants at the indicated times after ABA treatment. The data represent the mean  $\pm$  SD of 3 independent experiments; at least 100 guard cells per line were measured at the indicated times.

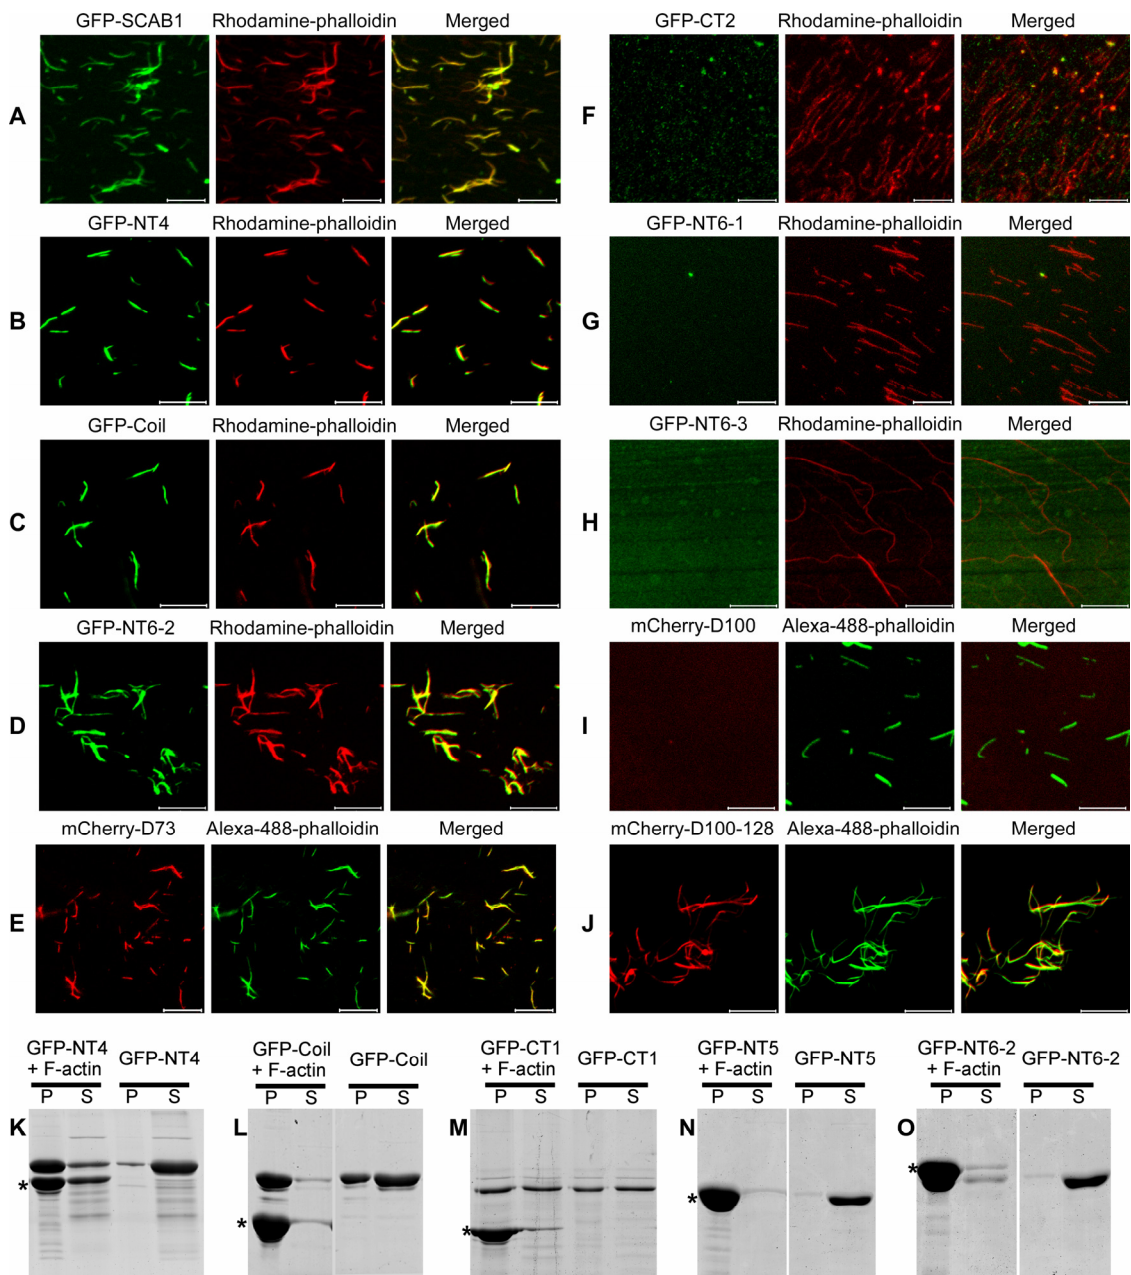

**Supplemental Figure 10. Identification of the actin-binding domain of SCAB1.**

(A-J) Rhodamine-phalloidin- (A-D and F-H) or Alexa-488-phalloidin-stained (E, I, and J) actin filaments were incubated with GFP-tagged SCAB1 (A), NT4 (B), Coil (C), NT6-2 (D), CT2 (F), NT6-1 (G), or NT6-3 (H), and mCherry-tagged D73 (E), D100 (I), or D100-128 (J). Left panel: GFP or mCherry labeled SCAB1 truncated proteins; middle panel: actin filaments stained with rhodamine- or

Alexa-488-phalloidin; right panel: merged images. Bars, 10  $\mu$ m.

**(K-O)** High-speed cosedimentation assays of GFP-NT4 **(K)**, GFP-Coil **(L)**, GFP-CT1 **(M)**, GFP-NT5 **(N)**, and GFP-NT6-2 **(O)** in the presence or absence of MFs. After centrifugation at 150,000  $\times g$ , the proteins in the supernatant (S) and pellet (P) were resolved by SDS-PAGE. Asterisks represent actin.

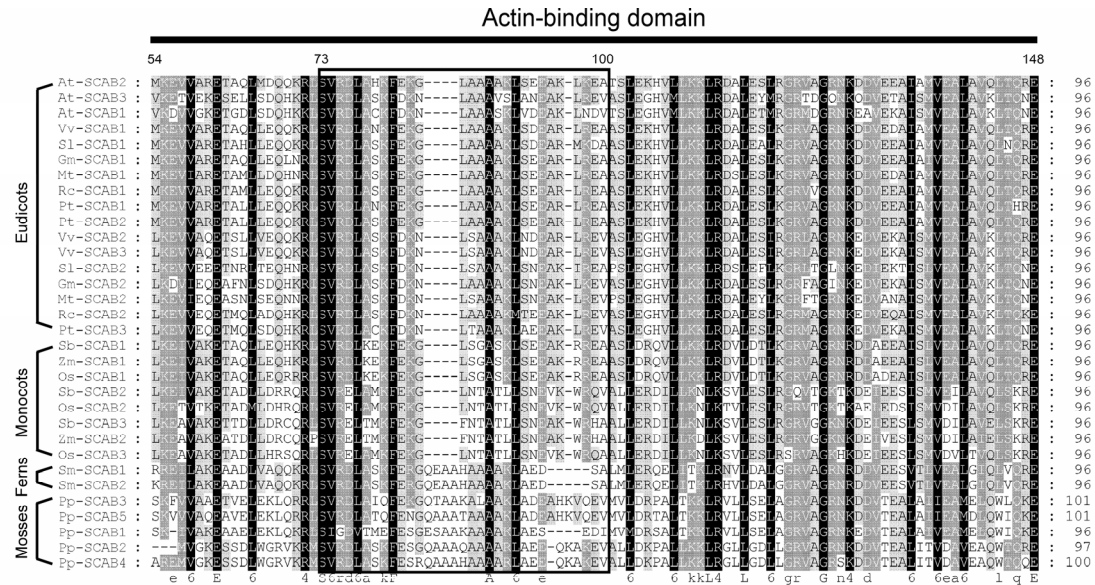

**Supplemental Figure 11. Alignment of the actin-binding domains from SCAB1 homologs.**

SCAB1 homologs from *Arabidopsis*, bean, alfalfa, grape, poplar, castor, tomato, rice, maize, sorghum, *Selaginella*, and *Physcomitrella* (Supplemental Table 1 online) were aligned using ClustalX 2.0.5 (Larkin et al., 2007) with the default settings. The conserved actin-binding region was selected and viewed using GeneDoc software (<http://www.nrbsc.org/gfx/genedoc/>). The residues indicated by the rectangular box (corresponding to residues 73-100 of SCAB1) were critical for actin binding.

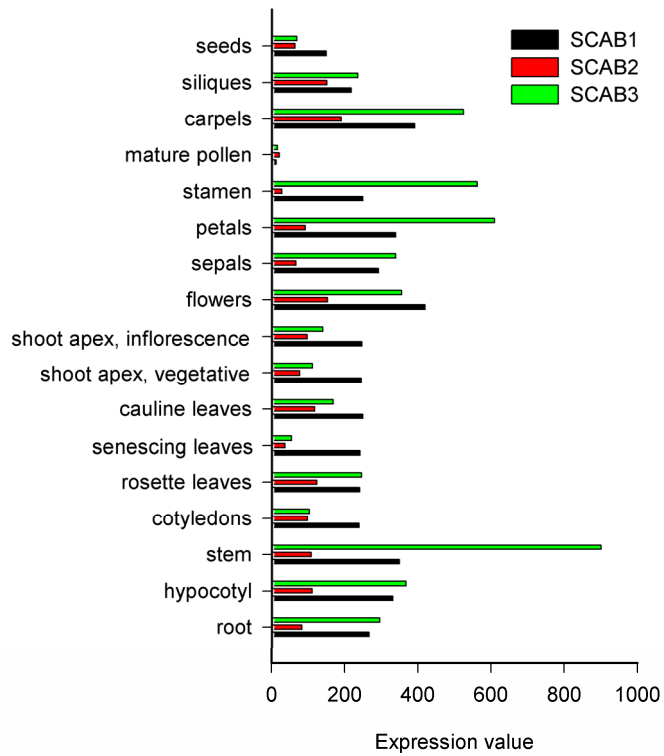

**Supplemental Figure 12. Expression of *SCAB1* and its homologous genes in *Arabidopsis*.**

Microarray analysis of the expression of *SCAB1* and its homologs in different organs using data from AtGeneExpress (Schmid et al., 2005).

**Supplemental Table 1. Accession number of proteins with sequence similarity to SCAB1 (E-value < 1e-90).**

| <b>Species</b>                    | <b>Protein ID</b> | <b>Accession number</b> | <b>Gene Locus</b>     |
|-----------------------------------|-------------------|-------------------------|-----------------------|
| <i>Arabidopsis thaliana</i>       | AtSCAB1           | O48791                  | At2g26770             |
|                                   | AtSCAB2           | Q8GX05                  | At3g56480             |
|                                   | AtSCAB3           |                         | At3g56480             |
| <i>Glycine max</i>                | GmSCAB1           | C6TC02                  |                       |
|                                   | GmSCAB2           | C6TEU5                  |                       |
| <i>Medicago truncatula</i>        | MtSCAB1           |                         | Medtr5g095960         |
|                                   | MtSCAB2           |                         | Medtr7g106120         |
| <i>Populus trichocarpa</i>        | PtSCAB1           | B9HNJ6                  | POPTRDRAFT_804415     |
|                                   | PtSCAB2           | B9GFS8                  | POPTRDRAFT_752371     |
|                                   | PtSCAB3           | B9H8S2                  | POPTRDRAFT_818999     |
|                                   | PtSCAB4           | B9IHM8                  | POPTRDRAFT_734721     |
| <i>Ricinus communis</i>           | RcSCAB1           | B9SB74                  | RCOM_0785850          |
|                                   | RcSCAB2           | B9RU60                  | RCOM_1632320          |
| <i>Solanum lycopersicum</i>       | SISCAB1           |                         | SL1.00sc05103_116.1.1 |
|                                   | SISCAB2           |                         | SL1.00sc00141_157.1.1 |
| <i>Vitis vinifera</i>             | VvSCAB1           | D7T1E3                  | VIT_00037402001       |
|                                   | VvSCAB2           | D7TQT9                  | VIT_00025779001       |
|                                   | VvSCAB3           | A5ALR3                  | VITISV_039755         |
| <i>Oryza sativa</i>               | OsSCAB1           | Q0JIF1                  | Os01g0805700          |
|                                   | OsSCAB2           | Q10KZ6                  | Os03g0364500          |
|                                   | OsSCAB3           | Q7XHY6                  | Os07g0642800          |
| <i>Sorghum bicolor</i>            | SbSCAB1           | C5XMJ3                  | Sb03g037470           |
|                                   | SbSCAB2           | C5WYR7                  | Sb01g034550           |
|                                   | SbSCAB3           | C5X3Y5                  | Sb02g040980           |
| <i>Zea mays</i>                   | ZmSCAB1           | B4FKU4                  | Zm.5950.              |
|                                   | ZmSCAB2           | B4FKT7                  | Zm.17411.             |
| <i>Selaginella moellendorffii</i> | SmSCAB1           | D8SYV7                  | SELMODRAFT_128387     |
|                                   | SmSCAB2           | D8S730                  | SELMODRAFT_110449     |
| <i>Physcomitrella patens</i>      | PpSCAB1           | A9RK58                  | PHYPADRAFT_115719     |
|                                   | PpSCAB2           | A9SLZ6                  | PHYPADRAFT_213766     |
|                                   | PpSCAB3           | A9TJ68                  | PHYPADRAFT_146374     |
|                                   | PpSCAB4           | A9TGG1                  | PHYPADRAFT_145201     |
|                                   | PpSCAB5           | A9S5Y9                  | PHYPADRAFT_124545     |

**Supplemental Table 2. Primers used in this study.**

| <b>Primer name</b>              | <b>Sequence</b>                          |
|---------------------------------|------------------------------------------|
| pSKI015 RB                      | 5'-TAATACGACTCACTATAGGGC-3'              |
| pCSA110 LB1                     | 5'-GCCTTTTCAGAAATGGATAAATAGCCTTGCTTCC-3' |
| pCSA110 LB3                     | 5'-TAGCATCTGAATTCATAACCAATCTCGATACAC-3'  |
| <i>scab1-1</i> F                | 5'-GTGGCAGGTAGAAACAAGGATG-3'             |
| <i>scab1-1</i> R                | 5'-GAGCAAGGTCTAACTCGCAAAC-3'             |
| <i>scab1-2</i> F                | 5'-TCGCTGAGTCAACTGAAC-3'                 |
| <i>scab1-2</i> R                | 5'-GTCGGATCCATGACAAGGGTTACACGCGATTTTC-3' |
| SCAB1 F                         | 5'-ATGAGCTTCGAGCACTAAGAAATCAGC-3'        |
| SCAB1 R                         | 5'-GAGCAAGGTCTAACTCGCAAAC-3'             |
| <i>EF1<math>\alpha</math></i> F | 5'-TGAGCACGCTCTTCTTGCTTTCA-3'            |
| <i>EF1<math>\alpha</math></i> R | 5'-GGTGGTGGCATCCATCTTGTTACA-3'           |
| SCAB1 CDSF                      | 5'-GTCGGATCCATGACAAGGGTTACACGCGATTTTC-3' |
| SCAB1 CDSR                      | 5'-GCTGAATTCTCAAGGGCTTTGACCCGTCTC-3'     |
| SCAB1Pro <i>Pst</i> IF          | 5'-AGCTGCAGTGGGAAGTTATAGTTTATCCG-3'      |
| SCAB1Pro<br><i>Bam</i> HIR      | 5'-GTCGGATCCTGTATCTGTTTATAAACAAC-3'      |
| <i>GFP Bam</i> HIF              | 5'-AAGGATCCATGGTGAGCAAGGGCGAG-3'         |
| <i>GFP Bam</i> HIR              | 5'-ATGGATCCCTTGACAGCTCGTCCATG-3'         |



**Supplemental Table 3. Primers used for plasmid constructions.**

| <b>Plasmids</b>              | <b>Forward primers</b>                                | <b>Reverse primers</b>                                 |
|------------------------------|-------------------------------------------------------|--------------------------------------------------------|
| pCAMBIA1205-GFP-Coil         | 5'-TCGGATCCATGAAAGAG<br>GTTGTTGCG-3'                  | 5'-CTGAATTCTCACTTTCT<br>GCACATTGCGAG-3'                |
| pCAMBIA1205-GFP-NT4          | 5'-GTCGGATCCATGACAAG<br>GGTTACACGCGATTTTC-3'          | 5'-CTGAATTCTCATCGCT<br>GAGTCAACTGAAC-3'                |
| pCAMBIA1205-GFP-NT5          | 5'-TCGGATCCATGAAAGAG<br>GTTGTTGCG-3'                  | 5'-CTGAATTCTCATCGCT<br>GAGTCAACTGAAC-3'                |
| pCAMBIA1205-GFP-NT6-1        | 5'-TCGGATCCATGGTTTCGT<br>GACCTCGCTC-3'                | 5'-CTGAATTCTCACTTGTT<br>TCTACCTGCCAC-3'                |
| pCAMBIA1205-GFP-NT6-2        | 5'-TCGGATCCATGGTTTCGT<br>GACCTCGCTC-3'                | 5'-CTGAATTCTCATCGCT<br>GAGTCAACTGAAC-3'                |
| pCAMBIA1205-GFP-NT6-3        | 5'-TCGGATCCATGAAAGAG<br>GTTGTTGCG-3'                  | 5'-CTGAATTCTCACTTGT<br>TTCTACCTGCCAC-3'                |
| pCAMBIA1205-GFP-CT1          | 5'-TAGGATCCATGGATATGG<br>AATATGAGCTTC-3'              | 5'-GCTGAATTCTCAAGGG<br>CTTTGACCCGTCTC-3'               |
| pCAMBIA1205-GFP-CT2          | 5'-TAGGATCCAGCGAGGAA<br>AATATATCCCTTG-3'              | 5'-GCTGAATTCTCAAGGG<br>CTTTGACCCGTCTC-3'               |
| pCAMBIA1205-mCherry-D73      | 5'-TCGGATCCGTTTCGTGAC<br>CTCGCTC-3'                   | 5'-GCTGAATTCTCAAGGG<br>CTTTGACCCGTCTC-3'               |
| pCAMBIA1205-mCherry-D100     | 5'-TCGGATCCATGACTTCG<br>TTGGAGAAAC-3'                 | 5'-GCTGAATTCTCAAGGG<br>CTTTGACCCGTCTC-3'               |
| pCAMBIA1205-mCherry-D73-100  | 5'-GTCGGATCCATGACAAG<br>GGTTACACGCGATTTTC-3'          | 5'-CATGTTTCTCCAACGA<br>AGTAGACAAACGTTTCTG<br>CTG-3'    |
|                              | 5'-CAGCAGAAACGTTTGTC<br>TACTTCGTTGGAGAAACAT<br>G-3'   | 5'-GCTGAATTCTCAAGGG<br>CTTTGACCCGTCTC-3'               |
| pCAMBIA1205-mCherry-D100-128 | 5'-GTCGGATCCATGACAAG<br>GGTTACACGCGATTTTC-3'          | 5'-ATGGCTTCCTCTACAT<br>CATCTGCTTCTTTGAGTT<br>TTGCCT-3' |
|                              | 5'-AGGCAAACTCAAAGAA<br>GCAGATGATGTAGAGGAAG<br>CCAT-3' | 5'-GCTGAATTCTCAAGGG<br>CTTTGACCCGTCTC-3'               |
